# Supplementary material for: StackDPP: Stacking-Based Explainable Classifier for Depression Prediction and Finding the Risk Factors among Clinicians
Source: MDPI journal article supplement (doi:10.3390/bioengineering10070858), 2023-07-20
Supplement: s1 [file s1]

## Questionnaire

### Depression among medical professionals in Bangladesh

Serial no:

#### A| Socio-demographic Questions

1. Age \_\_\_\_\_ years
2. Weight \_\_\_\_\_ kg
3. Height \_\_\_\_\_ Ft.
4. Sex: ① Male ② Female
5. What is your occupation/Designation? \_\_\_\_\_
6. What's type of organization are you working? ① Government ② Non-government ③ Self
7. How many year ago have you finished your Bachelor/Diploma courses? \_\_\_\_\_
8. What is your highest level of education? ① MBBS ② BDS ③ Diploma ④ BSc ⑤ MPH ⑥ Others \_\_\_\_\_
9. Religion: ① Muslim ② Hindu ③ Buddhist ④ Christian ⑤ Others
10. Marital status : ① Married ② Unmarried
11. Types of family: ① Nuclear ② Joint
12. Monthly personal income (Approximately) \_\_\_\_\_ tk.
13. Where you have been living for last two years? ① Urban area ② Rural area
14. Do you live in your own house? ① Yes ② No
15. Do you live with your family? ① Yes ② No
16. Are you suffering from any kinds of chronic diseases? ① Yes ② No. If Yes, Which \_\_\_\_\_

#### B| Depression Assessment

17. Little interest or pleasure in doing things?  
① Not at all ② several days ③ More than half of the days ④ Nearly every days
18. Feeling down, depressed, or hopeless?  
① Not at all ② several days ③ More than half of the days ④ Nearly every days
19. Trouble falling or staying asleep, or sleeping too much?  
① Not at all ② several days ③ More than half of the days ④ Nearly every days
20. Feeling tired or having little energy?  
① Not at all ② several days ③ More than half of the days ④ Nearly every days
21. Poor appetite or overeating?  
① Not at all ② several days ③ More than half of the days ④ Nearly every days
22. Feeling bad about yourself — or that you are a failure or have let yourself or your family down?  
① Not at all ② several days ③ More than half of the days ④ Nearly every days
23. Trouble concentrating on things, such as reading the newspaper or watching television?  
① Not at all ② several days ③ More than half of the days ④ Nearly every days
24. Moving or speaking so slowly that other people could have noticed? Or so fidgety or restless that you have been moving a lot more than usual?  
① Not at all ② several days ③ More than half of the days ④ Nearly every days

25. Thoughts that you would be better off dead, or thoughts of hurting yourself in some way?

① Not at all ② several days ③ More than half of the days ④ Nearly every days

C| Job satisfaction analysis

|                                                                                                              | Strongly Disagree | Disagree | Agree | Strongly Agree |
|--------------------------------------------------------------------------------------------------------------|-------------------|----------|-------|----------------|
| 26. The management of this organization is supportive of me.                                                 | ①                 | ②        | ③     | ④              |
| 27. I receive the right amount of support and guidance from my direct supervisor.                            | ①                 | ②        | ③     | ④              |
| 28. I am provided with all trainings necessary for me to perform my job.                                     | ①                 | ②        | ③     | ④              |
| 29. I have learned many new job skills in this position.                                                     | ①                 | ②        | ③     | ④              |
| 30. I feel encouraged by my supervisor to offer suggestions and improvements.                                | ①                 | ②        | ③     | ④              |
| 31. The management makes changes based on my suggestions and feedback.                                       | ①                 | ②        | ③     | ④              |
| 32. I am appropriately recognized when I perform well at my regular work duties.                             | ①                 | ②        | ③     | ④              |
| 33. The organization rules make it easy for me to do a good job.                                             | ①                 | ②        | ③     | ④              |
| 34. I am satisfied with my chances for promotion.                                                            | ①                 | ②        | ③     | ④              |
| 35. I have adequate opportunities to develop my professional skills.                                         | ①                 | ②        | ③     | ④              |
| 36. I have an accurate written job description.                                                              | ①                 | ②        | ③     | ④              |
| 37. The amount of work I am expected to finish each week is reasonable.                                      | ①                 | ②        | ③     | ④              |
| 38. My work assignments are always clearly explained to me.                                                  | ①                 | ②        | ③     | ④              |
| 39. My work is evaluated based on a fair system of performance standards.                                    | ①                 | ②        | ③     | ④              |
| 40. My department provides all the equipment, supplies, and resources necessary for me to perform my duties. | ①                 | ②        | ③     | ④              |
| 41. The buildings, grounds, and layout of this facility are adequate for me to perform my duties.            | ①                 | ②        | ③     | ④              |
| 42. My coworkers and I work well together.                                                                   | ①                 | ②        | ③     | ④              |
| 43. I feel I can easily communicate with members from all levels of this organization.                       | ①                 | ②        | ③     | ④              |

D| Others

44. Do you smoke? ① Yes ② No

45. Do you walk/exercise every day at least 15 minute apart from your regular activities? ① Yes ② No
